# Supplementary material for: Magnetic Resonance Imaging Measurement of Entorhinal Cortex in the Diagnosis and Differential Diagnosis of Mild Cognitive Impairment and Alzheimer’s Disease
Source: MDPI journal article supplement (doi:10.3390/brainsci11091129), 2021-08-26
Supplement: s1 [file s1]

# Supplementary Materials: Magnetic Resonance Imaging Measurement of Entorhinal Cortex in the Diagnosis and Differential Diagnosis of Mild Cognitive Impairment and Alzheimer's Disease

Qianqian Li <sup>1,2,†</sup>, Junkai Wang <sup>3,†</sup>, Jianghong Liu <sup>4</sup>, Yumeng Wang <sup>5</sup> and Kuncheng Li <sup>1,2,\*</sup>

**Table S1.** The AUCs of thickness, surface area and volume of ERC.

|                  | Thickness |       | Surface area |       | Volume |       |
|------------------|-----------|-------|--------------|-------|--------|-------|
|                  | right     | left  | right        | left  | right  | left  |
| HC vs aMCI-s     | 0.558     | 0.711 | 0.580        | 0.536 | 0.684  | 0.639 |
| HC vs aMCI-m     | 0.736     | 0.729 | 0.553        | 0.510 | 0.774  | 0.778 |
| HC vs AD         | 0.908     | 0.876 | 0.579        | 0.505 | 0.863  | 0.860 |
| aMCI-s vs aMCI-m | 0.647     | 0.505 | 0.513        | 0.520 | 0.589  | 0.527 |
| aMCI-s vs AD     | 0.824     | 0.711 | 0.541        | 0.510 | 0.724  | 0.711 |
| aMCI-m vs AD     | 0.694     | 0.707 | 0.519        | 0.514 | 0.654  | 0.697 |

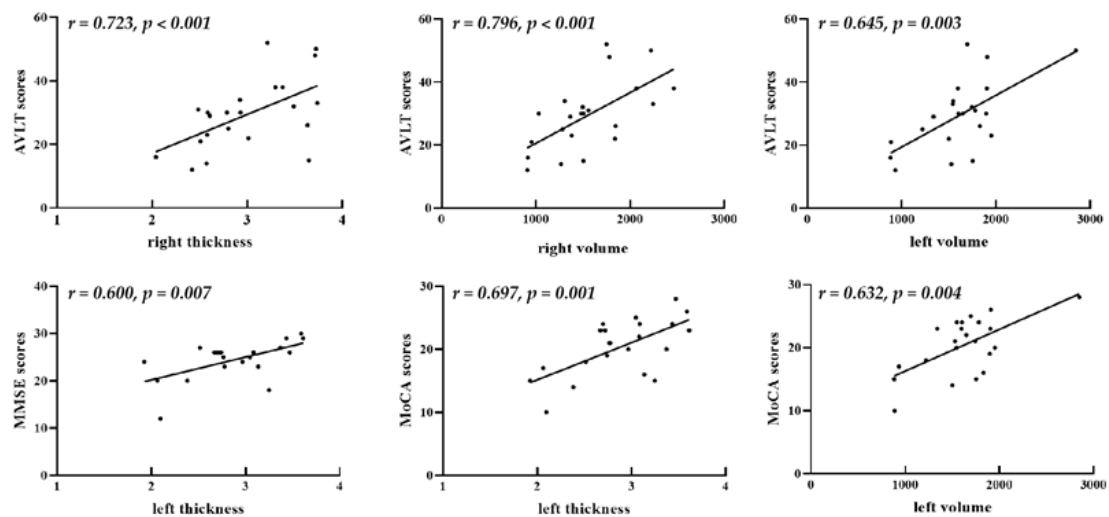

**Figure S1.** The relationship between ERC morphometric measurements and memory performance in aMCI-m group. Note: thickness and volume of ERC were measured in millimeters (mm) and cubic millimeters (mm<sup>3</sup>) respectively.

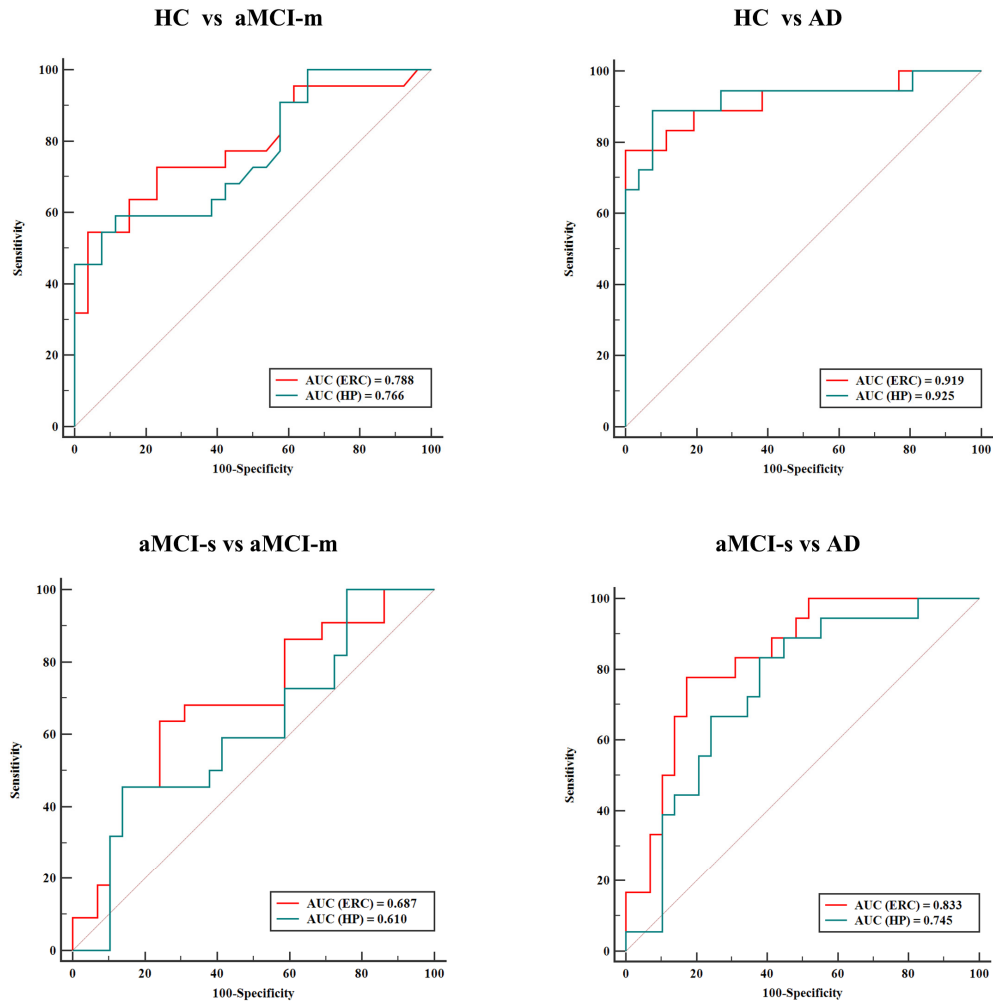

**Figure S2.** The ERC vs HP in discriminating HC from aMCI-m, HC from AD, aMCI-s from aMCI-m and aMCI-s from AD. Red: entorhinal cortex; Green: hippocampus.
